# Supplementary material for: Precision and Limits of Detection for Selected Commercially Available, Low-Cost Carbon Dioxide and Methane Gas Sensors
Source: MDPI journal article supplement (doi:10.3390/s19143157), 2019-07-18
Supplement: s1 [file s1]

# Supplementary Materials: Background and Properties of Selected Commercially Available, Low-cost Carbon Dioxide and Methane Gas Concentration Sensors

Wesley T. Honeycutt <sup>1,†</sup>, M. Tyler Ley <sup>2</sup>, and Nicholas F. Materer <sup>3,\*</sup>

## 1 Selection Rational

2 The selection rational, sensing method, and selected properties obtained from the manufacturer  
3 documentation is tabulated below. Sensors can be generally categorized by detection method,  
4 which as optical absorption, chemiresistive (based on the resistance changes of a material due to  
5 chemical reaction with an analyte [1]), and electrochemical. Since studies have cited concerns with  
6 electrochemical gas concentration sensors, such as a short lifetime and lack of robustness [2], only  
7 optical and chemiresistive sensors were selected. The potential application of the selected sensors is also  
8 impotent in the selection. For this study, the application includes, but is not limited to, environmental  
9 monitoring of local gas concentration and detection of leaks around industrial locations. For such  
10 applications, the collection of multiple samples at several locations in a given area (possibility including  
11 places without power availability) is critical to obtain reliable results. Thus, with only two exceptions,  
12 sensors selected were all commercially available in large volumes (at least 1000 units) at low-cost  
13 (defined here as less than \$100 per unit in bulk) The sensors were further selected based on the  
14 reported sensitivity at environmental concentrations of CO<sub>2</sub> (around 400 ppm [3,4]) and CH<sub>4</sub> ( under 2  
15 ppm [5–7]), and at concentrations of several thousand ppm, which simulate a potential leak. In the  
16 selection process, the cost, limit of detection, precision, accuracy, reliability, and power consumption  
17 are all important parameters, many of which are not reported the manufacture or cannot be directly  
18 compared to other similar sensors.

## 19 Sensing Technology

20 Lower cost optical sensors typically utilize nondispersive infrared (NDIR) sensing. This method  
21 utilizes a broad spectrum light source which is restricted by a narrow band pass filter across the  
22 absorbance maximum before reaching the detector. Since these sensors utilize the Beer-Lambert law to  
23 relate absorption to concentration, the calibration is only dependent on the geometry of the sensor and  
24 physical properties of the gas [8]. In general, NDIR detection is utilized for CO<sub>2</sub> due to its relatively  
25 large molar absorption coefficient, allowing for short path lengths to be used in devices. For CH<sub>4</sub>,  
26 NDIR detection is limited due to its lower absorption coefficient and overlapping symmetric C-H  
27 stretches. The overlapping stretches makes CH<sub>4</sub> difficult to distinguish from other common aliphatic  
28 gases such as ethane and propane [9]. The selected lower cost chemiresistive sensors typically detect  
29 CH<sub>4</sub> using a thin oxide film [2] and work by measuring resistance changes due to differences in the  
30 electron transport through the metal oxide film, in the presence of oxygen and target gases [10]. The  
31 resistance change is typically non-linear with the analyte concentration. The chemiresistive sensors are  
32 known to respond to a range of hydrocarbon gases [11], which should be considered when integrating  
33 these sensors into a sensor platform.

## 34 Selected Sensors

35 Table S1 lists the selected CO<sub>2</sub> sensors with important properties obtained from the manufacturer.  
36 Table S2 lists the CH<sub>4</sub> or hydrocarbon sensors and respective properties. The K-30, COZIR, Dynament,  
37 and Telaire sensors are all NDIR sensors. These sensors were chosen as low-cost, lightweight sensors  
38 with satisfactory detection parameters of CO<sub>2</sub>. Dynament also provides a dual gas NDIR sensor  
39 (MSH-DP/HC/CO<sub>2</sub>/) designed to measure both CO<sub>2</sub> and CH<sub>4</sub> concentrations. This ability was  
40 attractive given low-cost and portability requirements. The CO<sub>2</sub> and CH<sub>4</sub> Gascard sensors sold by  
41 GHG Analytical were an order of magnitude more expensive than the other chosen NDIR sensors,

which have a cost between that of the lowest cost sensors on our list and that of the bench-top analyzers. Their specifications combined with the included pressure and temperatures compensation make them attractive enough to make up for the expense. In addition to the Gascard sensor, the Dynament hydrocarbon sensors (MSH-P/HC and MSH-DP/HC/CO<sub>2</sub>/) were chosen as inexpensive candidates for CH<sub>4</sub> detection. Chemoresistive sensors include the MQ-4 from Hanwei Electronics and TGS-2600, TGS-2610, and TGS-2611 manufactured by Figaro Engineering Inc. sensors. The TGS sensors are used in commercial CH<sub>4</sub> and air quality detectors. There are several different MQ versions optimized for hydrocarbon sensing. The MQ-4 sensor was chosen as this variant was specifically tuned for CH<sub>4</sub>.

**Table S1.** Manufacturer listed properties of evaluated CO<sub>2</sub> sensors

| Sensor                            | Supplier              | Type | Sampling Method   | Cal. Range   | Op. Range   |
|-----------------------------------|-----------------------|------|-------------------|--------------|-------------|
| K-30 SE-0018                      | CO <sub>2</sub> Meter | NDIR | flow or diffusion | 0-5000 ppm   | 0-10000 ppm |
| COZIR AMB GC-020                  | CO <sub>2</sub> Meter | NDIR | flow or diffusion | 0-5000 ppm   | 0-10000 ppm |
| Gascard CO <sub>2</sub>           | GHG Analytical        | NDIR | flow              | 0-50000 ppm  | 0-50000 ppm |
| MSH-P/CO <sub>2</sub> /NC/5/V/P/F | Dynament              | NDIR | diffusion         | 0-2491 ppm   | 0-5000 ppm  |
| MSH-DP/HC/CO <sub>2</sub> /NC/P/F | Dynament              | NDIR | diffusion         | 100-2500 ppm | 0-5000 ppm  |
| Telaire T6615                     | General Electric      | NDIR | flow or diffusion | 0-2000 ppm   | 0-2000 ppm  |

  

| Sensor                            | Warm Up | T        | Humidity | Auto-cal | V Input      | Avg. I   |
|-----------------------------------|---------|----------|----------|----------|--------------|----------|
| K-30 SE-0018                      | <1 min  | 0-50°C   | 0-95%    | Yes      | 4.5-14 VDC   | 40 mA    |
| COZIR AMB GC-020                  | <3 s    | 0-50°C   | 0-95%    | Yes      | 3.25-5.5 VDC | 1.5 mA   |
| Gascard CO <sub>2</sub>           | 30 s    | 0-45°C   | 0-95%    | Yes      | 7-30 VDC     | 250 mA   |
| MSH-P/CO <sub>2</sub> /NC/5/V/P/F | 45 s    | -20-50°C | 0-95%    | No       | 3.0-5.0 VDC  | 75-85 mA |
| MSH-DP/HC/CO <sub>2</sub> /NC/P/F | 45 s    | -20-50°C | 0-95%    | No       | 3.0-5.0 VDC  | 75-85 mA |
| Telaire T6615                     | 10 min  | 0-50°C   | 0-95%    | Yes      | 0-5 VDC      | 33 mA    |

**Table S2.** Manufacturer listed properties of evaluated CH<sub>4</sub> sensors

| Sensor                            | Supplier           | Type           | Sampling Method | Cal. Range     | Op. Range      |
|-----------------------------------|--------------------|----------------|-----------------|----------------|----------------|
| MQ-4                              | Futurelec          | chemiresistive | diffusion       |                | 200-10000 ppm  |
| Gascard CH <sub>4</sub>           | GHG Analytical     | NDIR           | flow            | 0-50000 ppm    | 0-50000 ppm    |
| MSH-P/HC/NC/5/V/P/F               | Dynament           | NDIR           | diffusion       | 0-5000 ppm     | 0-10000 ppm    |
| MSH-DP/HC/CO <sub>2</sub> /NC/P/F | Dynament           | NDIR           | diffusion       | 5000-11000 ppm | 0-10000 ppm    |
| TGS-2600                          | Figaro Engineering | chemiresistive | diffusion       |                | 1-30 ppm       |
| TGS-2610                          | Figaro Engineering | chemiresistive | diffusion       |                | 1000-25000 ppm |
| TGS-2611                          | Figaro Engineering | chemiresistive | diffusion       |                | 500-10000 ppm  |

  

| Sensor                            | Warm Up | T        | Humidity | Auto-cal | V Input     | Avg. I   |
|-----------------------------------|---------|----------|----------|----------|-------------|----------|
| MQ-4                              |         |          |          | No       | 5 VDC       | <150 mA  |
| Gascard CH <sub>4</sub>           | 30 s    | 0-45°C   | 0-95%    | Yes      | 7-30 VDC    | 250 mA   |
| MSH-P/HC/NC/5/V/P/F               | 30 s    | -20-50°C | 0-95%    | No       | 3.0-5.0 VDC | 75-85 mA |
| MSH-DP/HC/CO <sub>2</sub> /NC/P/F | 30 s    | -20-50°C | 0-95%    | No       | 3.0-5.0 VDC | 75-85 mA |
| TGS-2600                          |         |          |          | No       | 5.0±0.2 VDC | 4.2±4 mA |
| TGS-2610                          |         |          |          | No       | 5.0±0.2 VDC | 5.6±5 mA |
| TGS-2611                          |         |          |          | No       | 5.0±0.2 VDC | 5.6±5 mA |

Sensors with no listed warm-up time required 7-day burn-in time

## References

- Wetchakun, K.; Samerjai, T.; Tamaekong, N.; Liewhiran, C.; Siri Wong, C.; Kruefu, V.; Wisitsoraat, A.; Tuantranont, A.; Phanichphant, S. Semiconducting Metal Oxides as Sensors for Environmentally Hazardous Gases. *Sensors and Actuators B: Chemical* **2011**, *160*, 580–591. doi:https://doi.org/10.1016/j.snb.2011.08.032.
- Neri, G. First Fifty Years of Chemoresistive Gas Sensors. *Chemosensors* **2015**, *3*, 1–20. doi:10.3390/chemosensors3010001.

- 57 3. Blasing, T. Recent Greenhouse Gas Concentrations. Technical report, U. S. Department of Energy, CDIAC,  
58 2016.
- 59 4. Dlugokencky, E. Trends in Atmospheric Methane. Technical report, NOAA/ESRL, 2016.
- 60 5. Turner, A.J.; Jacob, D.J.; Benmergui, J.; Wofsy, S.C.; Maasakkers, J.D.; Butz, A.; Hasekamp, O.; Biraud, S.C.  
61 A Large Increase in U.S. Methane Emissions over the Past Decade Inferred from Satellite Data and Surface  
62 Observations. *Geophysical Research Letters* **2016**, *43*, 2218–2224. doi:10.1002/2016GL067987.
- 63 6. Bamberger, I.; Stieger, J.; Buchmann, N.; Eugster, W. Spatial Variability of Methane:  
64 Attributing Atmospheric Concentrations to Emissions. *Environmental Pollution* **2014**, *190*, 65–74.  
65 doi:10.1016/j.envpol.2014.03.028.
- 66 7. Dlugokencky, E.; Tans, P. Trends in Atmospheric Carbon Dioxide. Technical report, NOAA/ESRL, 2016.
- 67 8. Bacsik, Z.; Mink, J.; Keresztury, G. FTIR Spectroscopy of the Atmosphere. I. Principles and Methods.  
68 *Applied Spectroscopy Reviews* **2004**, *39*, 295–363. doi:10.1081/ASR-200030192.
- 69 9. Coblenz Society, Inc.. Evaluated Infrared Reference Spectra. In *NIST Chemistry WebBook*; Lindstrom, P.J.;  
70 Mallard, W.G., Eds.; Number 69 in NIST Standard Reference Database, National Institute of Standards and  
71 Technology: Gaithersburg MD, 20899.
- 72 10. Albert, K.J.; Lewis, N.S.; Schauer, C.L.; Sotzing, G.A.; Stitzel, S.E.; Vaid, T.P.; Walt, D.R. Cross-Reactive  
73 Chemical Sensor Arrays. *Chemical Reviews* **2000**, *100*, 2595–2626. doi:10.1021/cr980102w.
- 74 11. Sekhar, P.K.; Kysar, J.; Brosha, E.L.; Kreller, C.R. Development and Testing of an  
75 Electrochemical Methane Sensor. *Sensors and Actuators B: Chemical* **2016**, *228*, 162 – 167.  
76 doi:https://doi.org/10.1016/j.snb.2015.12.100.
